# Supplementary material for: NCAPG Regulates Myogenesis in Sheep, and SNPs Located in Its Putative Promoter Region Are Associated with Growth and Development Traits
Source: MDPI journal article supplement (doi:10.3390/ani13203173), 2023-10-11
Supplement: s1 [file s1]

**Table S1** Summarized information and functional prediction of detect five mutations.

| SNP  | Position       | Ref > Alt | Mutation type<br>(Novel or Existed) | Distance to TSS<br>(bp) | Core similarity<br>score | Matrix<br>similarity score | Sequence          | Consequence  |
|------|----------------|-----------|-------------------------------------|-------------------------|--------------------------|----------------------------|-------------------|--------------|
| SNP1 | Chr6: 42090126 | T > A     | rs424493003                         | -1726                   | NA                       | NA                         | NA                | NA           |
| SNP2 | Chr6: 42090844 | C > T     | rs159958117                         | -1008                   | NA                       | NA                         | NA                | NA           |
| SNP3 | Chr6:42091061  | T > C     | rs423376306                         | -791                    | 1                        | 0.867                      | aacatgCACGTttgtaa | Score-Change |
|      |                |           |                                     |                         | 1                        | 0.866                      | aacacgCACGTttgtaa | Score-Change |
|      |                |           |                                     |                         | 1                        | 0.945                      | ctaaACAACacgca    | Gain of TFBS |
|      |                |           |                                     |                         | 1                        | 1                          | CACGCa            | Gain of TFBS |
| SNP4 | Chr6:42091075  | C > T     | rs417096593                         | -777                    | 1                        | 0.898                      | gtttgtaAATCAggcct | Gain of TFBS |
| SNP5 | Chr6:42091109  | T > A     | rs430255987                         | -743                    | 1                        | 1                          | aATTAA            | Gain of TFBS |

**Table S2** Association analysis between SNPs in *NCAPG* promoter region and growth and development traits.

| Age             | Traits             | SNP1     |                          |                    | SNP2       |                           |                    | SNP3     |                           |                    | SNP4     |                          |                    | SNP5     |       |                    |
|-----------------|--------------------|----------|--------------------------|--------------------|------------|---------------------------|--------------------|----------|---------------------------|--------------------|----------|--------------------------|--------------------|----------|-------|--------------------|
|                 |                    | Genotype | Mean                     | Standard deviation | Genotype   | Mean                      | Standard deviation | Genotype | Mean                      | Standard deviation | Genotype | Mean                     | Standard deviation | Genotype | Mean  | Standard deviation |
| At birth        | body weight        | A/A      | 3.39                     | 0.24               | C/C        | 3.28                      | 0.13               | C/C      | 3.39                      | 0.24               | C/C      | 3.28                     | 0.13               | A/A      | 3.09  | 0.11               |
|                 |                    | T/A      | 3.09                     | 0.10               | C/T        | 3.09                      | 0.10               | C/T      | 3.09                      | 0.10               | C/T      | 3.09                     | 0.10               | A/T      | 3.23  | 0.11               |
|                 |                    | T/T      | 3.29                     | 0.14               | T/T        | 3.39                      | 0.24               | T/T      | 3.27                      | 0.13               | T/T      | 3.39                     | 0.24               | T/T      | 3.54  | 0.32               |
|                 | body height        | A/A      | <b>36.76<sup>a</sup></b> | 2.05               | C/C        | <b>30.48<sup>b</sup></b>  | 1.12               | C/C      | <b>36.76<sup>a</sup></b>  | 2.05               | C/C      | <b>30.48<sup>b</sup></b> | 1.12               | A/A      | 30.14 | 0.95               |
|                 |                    | T/A      | <b>29.50<sup>b</sup></b> | 0.84               | C/T        | <b>29.52<sup>b</sup></b>  | 0.85               | C/T      | <b>29.56<sup>b</sup></b>  | 0.85               | C/T      | <b>29.52<sup>b</sup></b> | 0.85               | A/T      | 30.68 | 0.94               |
|                 |                    | T/T      | <b>30.56<sup>b</sup></b> | 1.15               | T/T        | <b>36.76<sup>a</sup></b>  | 2.05               | T/T      | <b>30.43<sup>b</sup></b>  | 1.13               | T/T      | <b>36.76<sup>a</sup></b> | 2.05               | T/T      | 32.80 | 2.75               |
|                 | body length        | A/A      | <b>29.73<sup>a</sup></b> | 1.75               | <b>C/C</b> | <b>25.98<sup>ab</sup></b> | 0.96               | C/C      | <b>29.73<sup>a</sup></b>  | 1.75               | C/C      | <b>25.98<sup>b</sup></b> | 0.96               | A/A      | 25.28 | 0.81               |
|                 |                    | T/A      | <b>24.92<sup>b</sup></b> | 0.72               | <b>C/T</b> | <b>24.91<sup>b</sup></b>  | 0.72               | C/T      | <b>24.92<sup>b</sup></b>  | 0.72               | C/T      | <b>24.91<sup>b</sup></b> | 0.72               | A/T      | 25.91 | 0.80               |
|                 |                    | T/T      | <b>26.01<sup>b</sup></b> | 0.98               | <b>T/T</b> | <b>29.73<sup>a</sup></b>  | 1.75               | T/T      | <b>25.96<sup>ab</sup></b> | 0.96               | T/T      | <b>29.73<sup>a</sup></b> | 1.75               | T/T      | 28.10 | 2.33               |
|                 | Shin circumference | A/A      | <b>5.46<sup>a</sup></b>  | 0.32               | <b>C/C</b> | <b>4.73<sup>b</sup></b>   | 0.17               | C/C      | <b>5.46<sup>a</sup></b>   | 0.32               | C/C      | <b>4.73<sup>b</sup></b>  | 0.17               | A/A      | 4.59  | 0.15               |
|                 |                    | T/A      | <b>4.50<sup>b</sup></b>  | 0.13               | <b>C/T</b> | <b>4.51<sup>b</sup></b>   | 0.13               | C/T      | <b>4.51<sup>b</sup></b>   | 0.13               | C/T      | <b>4.51<sup>b</sup></b>  | 0.13               | A/T      | 4.71  | 0.14               |
|                 |                    | T/T      | <b>4.74<sup>b</sup></b>  | 0.18               | <b>T/T</b> | <b>5.46<sup>a</sup></b>   | 0.32               | T/T      | <b>4.72<sup>b</sup></b>   | 0.17               | T/T      | <b>5.46<sup>a</sup></b>  | 0.32               | T/T      | 5.07  | 0.42               |
| One-month-old   | body weight        | A/A      | 9.35                     | 0.67               | C/C        | 8.75                      | 0.36               | C/C      | 9.35                      | 0.67               | C/C      | 8.75                     | 0.36               | A/A      | 8.29  | 0.31               |
|                 |                    | T/A      | 8.34                     | 0.27               | C/T        | 8.33                      | 0.28               | C/T      | 8.33                      | 0.28               | C/T      | 8.33                     | 0.28               | A/T      | 8.73  | 0.30               |
|                 |                    | T/T      | 8.76                     | 0.37               | T/T        | 9.35                      | 0.67               | T/T      | 8.75                      | 0.37               | T/T      | 9.35                     | 0.67               | T/T      | 9.58  | 0.88               |
|                 | body height        | A/A      | <b>43.94<sup>a</sup></b> | 2.49               | C/C        | <b>37.18<sup>b</sup></b>  | 1.36               | C/C      | <b>43.94<sup>a</sup></b>  | 2.49               | C/C      | <b>37.18<sup>b</sup></b> | 1.36               | A/A      | 36.32 | 1.16               |
|                 |                    | T/A      | <b>35.10<sup>b</sup></b> | 1.02               | C/T        | <b>35.09<sup>b</sup></b>  | 1.03               | C/T      | <b>35.12<sup>b</sup></b>  | 1.03               | C/T      | <b>35.09<sup>b</sup></b> | 1.03               | A/T      | 36.59 | 1.14               |
|                 |                    | T/T      | <b>37.26<sup>b</sup></b> | 1.40               | T/T        | <b>43.94<sup>a</sup></b>  | 2.49               | T/T      | <b>37.14<sup>b</sup></b>  | 1.37               | T/T      | <b>43.94<sup>a</sup></b> | 2.49               | T/T      | 39.90 | 3.34               |
|                 | body length        | A/A      | <b>41.99<sup>a</sup></b> | 2.42               | C/C        | <b>36.15<sup>b</sup></b>  | 1.33               | C/C      | <b>41.99<sup>a</sup></b>  | 2.42               | C/C      | <b>36.15<sup>b</sup></b> | 1.33               | A/A      | 34.98 | 1.12               |
|                 |                    | T/A      | <b>34.21<sup>b</sup></b> | 0.99               | C/T        | <b>34.22<sup>b</sup></b>  | 1.00               | C/T      | <b>34.24<sup>b</sup></b>  | 1.00               | C/T      | <b>34.22<sup>b</sup></b> | 1.00               | A/T      | 35.89 | 1.11               |
|                 |                    | T/T      | <b>36.25<sup>b</sup></b> | 1.36               | T/T        | <b>41.99<sup>a</sup></b>  | 2.42               | T/T      | <b>36.11<sup>b</sup></b>  | 1.33               | T/T      | <b>41.99<sup>a</sup></b> | 2.42               | T/T      | 38.57 | 3.24               |
|                 | Shin circumference | A/A      | <b>6.26<sup>a</sup></b>  | 0.36               | C/C        | <b>5.38<sup>b</sup></b>   | 0.20               | C/C      | <b>6.26<sup>a</sup></b>   | 0.36               | C/C      | <b>5.38<sup>a</sup></b>  | 0.20               | A/A      | 5.20  | 0.17               |
|                 |                    | T/A      | <b>5.09<sup>b</sup></b>  | 0.15               | C/T        | <b>5.09<sup>b</sup></b>   | 0.15               | C/T      | <b>5.10<sup>b</sup></b>   | 0.15               | C/T      | <b>5.09<sup>b</sup></b>  | 0.15               | A/T      | 5.36  | 0.16               |
|                 |                    | T/T      | <b>5.41<sup>b</sup></b>  | 0.20               | T/T        | <b>6.26<sup>a</sup></b>   | 0.36               | T/T      | <b>5.38<sup>b</sup></b>   | 0.20               | T/T      | <b>6.26<sup>a</sup></b>  | 0.36               | T/T      | 5.72  | 0.48               |
| Two-month-old   | body weight        | A/A      | <b>16.21<sup>a</sup></b> | 1.07               | C/C        | <b>13.32<sup>b</sup></b>  | 0.59               | C/C      | <b>16.21<sup>a</sup></b>  | 1.07               | C/C      | <b>13.32<sup>b</sup></b> | 0.59               | A/A      | 13.48 | 0.50               |
|                 |                    | T/A      | <b>12.97<sup>b</sup></b> | 0.44               | C/T        | <b>13.08<sup>b</sup></b>  | 0.44               | C/T      | <b>13.09<sup>b</sup></b>  | 0.44               | C/T      | <b>13.08<sup>b</sup></b> | 0.44               | A/T      | 13.40 | 0.49               |
|                 |                    | T/T      | <b>13.53<sup>b</sup></b> | 0.60               | T/T        | <b>16.21<sup>a</sup></b>  | 1.07               | T/T      | <b>13.31<sup>b</sup></b>  | 0.59               | T/T      | <b>16.21<sup>a</sup></b> | 1.07               | T/T      | 13.90 | 1.43               |
|                 | body height        | A/A      | <b>48.40<sup>a</sup></b> | 2.86               | C/C        | <b>38.81<sup>b</sup></b>  | 1.56               | C/C      | <b>48.40<sup>a</sup></b>  | 2.86               | C/C      | <b>38.81<sup>b</sup></b> | 1.56               | A/A      | 39.39 | 1.33               |
|                 |                    | T/A      | <b>37.96<sup>b</sup></b> | 1.17               | C/T        | <b>38.24<sup>b</sup></b>  | 1.18               | C/T      | <b>38.27<sup>b</sup></b>  | 1.18               | C/T      | <b>38.24<sup>b</sup></b> | 1.18               | A/T      | 39.39 | 1.31               |
|                 |                    | T/T      | <b>39.36<sup>b</sup></b> | 1.60               | T/T        | <b>48.40<sup>a</sup></b>  | 2.86               | T/T      | <b>38.76<sup>b</sup></b>  | 1.57               | T/T      | <b>48.40<sup>a</sup></b> | 2.86               | T/T      | 40.07 | 3.84               |
|                 | body length        | A/A      | <b>48.88<sup>a</sup></b> | 2.88               | C/C        | <b>39.62<sup>b</sup></b>  | 1.58               | C/C      | <b>48.88<sup>a</sup></b>  | 2.89               | C/C      | <b>39.62<sup>b</sup></b> | 1.58               | A/A      | 39.91 | 1.34               |
|                 |                    | T/A      | <b>38.49<sup>b</sup></b> | 1.18               | C/T        | <b>38.64<sup>b</sup></b>  | 1.20               | C/T      | <b>38.67<sup>b</sup></b>  | 1.19               | C/T      | <b>38.64<sup>b</sup></b> | 1.20               | A/T      | 39.95 | 1.32               |
|                 |                    | T/T      | <b>39.94<sup>b</sup></b> | 1.62               | T/T        | <b>48.88<sup>a</sup></b>  | 2.89               | T/T      | <b>39.57<sup>b</sup></b>  | 1.58               | T/T      | <b>48.88<sup>a</sup></b> | 2.89               | T/T      | 40.63 | 3.87               |
|                 | Shin circumference | A/A      | <b>6.84<sup>a</sup></b>  | 0.41               | C/C        | <b>5.55<sup>b</sup></b>   | 0.22               | C/C      | <b>6.84<sup>a</sup></b>   | 0.41               | C/C      | <b>5.55<sup>b</sup></b>  | 0.22               | A/A      | 5.56  | 0.19               |
|                 |                    | T/A      | <b>5.43<sup>b</sup></b>  | 0.17               | C/T        | <b>5.45<sup>b</sup></b>   | 0.17               | C/T      | <b>5.46<sup>b</sup></b>   | 0.17               | C/T      | <b>5.45<sup>b</sup></b>  | 0.17               | A/T      | 5.67  | 0.19               |
|                 |                    | T/T      | <b>5.60<sup>b</sup></b>  | 0.23               | T/T        | <b>6.84<sup>a</sup></b>   | 0.41               | T/T      | <b>5.54<sup>b</sup></b>   | 0.22               | T/T      | <b>6.84<sup>a</sup></b>  | 0.41               | T/T      | 5.73  | 0.54               |
| Three-month-old | body weight        | A/A      | <b>23.93<sup>a</sup></b> | 1.62               | C/C        | <b>19.64<sup>b</sup></b>  | 0.89               | C/C      | <b>23.93<sup>a</sup></b>  | 1.62               | C/C      | <b>19.64<sup>b</sup></b> | 0.89               | A/A      | 19.52 | 0.75               |
|                 |                    | T/A      | <b>18.63<sup>b</sup></b> | 0.66               | C/T        | <b>18.76<sup>b</sup></b>  | 0.67               | C/T      | <b>18.76<sup>b</sup></b>  | 0.67               | C/T      | <b>18.76<sup>b</sup></b> | 0.67               | A/T      | 19.45 | 0.74               |
|                 |                    | T/T      | <b>19.92<sup>b</sup></b> | 0.91               | T/T        | <b>23.93<sup>a</sup></b>  | 1.62               | T/T      | <b>19.64<sup>b</sup></b>  | 0.89               | T/T      | <b>23.93<sup>a</sup></b> | 1.62               | T/T      | 20.74 | 2.18               |
|                 | body height        | A/A      | <b>54.45<sup>a</sup></b> | 3.38               | C/C        | <b>43.62<sup>b</sup></b>  | 1.85               | C/C      | <b>54.45<sup>a</sup></b>  | 3.38               | C/C      | <b>43.62<sup>b</sup></b> | 1.85               | A/A      | 43.48 | 1.57               |
|                 |                    | T/A      | <b>41.42<sup>b</sup></b> | 1.38               | C/T        | <b>41.56<sup>b</sup></b>  | 1.40               | C/T      | <b>41.60<sup>b</sup></b>  | 1.40               | C/T      | <b>41.56<sup>b</sup></b> | 1.40               | A/T      | 43.20 | 1.55               |
|                 |                    | T/T      | <b>43.99<sup>b</sup></b> | 1.89               | T/T        | <b>54.45<sup>a</sup></b>  | 3.38               | T/T      | <b>43.56<sup>b</sup></b>  | 1.86               | T/T      | <b>54.45<sup>a</sup></b> | 3.38               | T/T      | 46.38 | 4.55               |

|               |                    |     |                    |      |     |                     |      |     |                    |      |     |                    |      |     |                     |      |
|---------------|--------------------|-----|--------------------|------|-----|---------------------|------|-----|--------------------|------|-----|--------------------|------|-----|---------------------|------|
|               | body length        | A/A | 56.20 <sup>a</sup> | 3.50 | C/C | 45.19 <sup>b</sup>  | 1.92 | C/C | 56.20 <sup>a</sup> | 3.50 | C/C | 45.19 <sup>b</sup> | 1.92 | A/A | 44.46               | 1.63 |
|               |                    | T/A | 42.48 <sup>b</sup> | 1.43 | C/T | 42.64 <sup>b</sup>  | 1.45 | C/T | 42.67 <sup>b</sup> | 1.45 | C/T | 42.64 <sup>b</sup> | 1.45 | A/T | 44.92               | 1.61 |
|               |                    | T/T | 45.62 <sup>b</sup> | 1.96 | T/T | 56.20 <sup>a</sup>  | 3.50 | T/T | 45.15 <sup>b</sup> | 1.92 | T/T | 56.20 <sup>a</sup> | 3.50 | T/T | 46.77               | 4.71 |
|               | Shin circumference | A/A | 7.22 <sup>a</sup>  | 0.46 | C/C | 6.03 <sup>b</sup>   | 0.25 | C/C | 7.22 <sup>a</sup>  | 0.46 | C/C | 6.03 <sup>b</sup>  | 0.25 | A/A | 5.85                | 0.22 |
|               |                    | T/A | 5.66 <sup>b</sup>  | 0.19 | C/T | 5.68 <sup>b</sup>   | 0.19 | C/T | 5.68 <sup>b</sup>  | 0.19 | C/T | 5.68 <sup>b</sup>  | 0.19 | A/T | 5.97                | 0.21 |
|               |                    | T/T | 6.07 <sup>b</sup>  | 0.26 | T/T | 7.22 <sup>a</sup>   | 0.46 | T/T | 6.02 <sup>b</sup>  | 0.26 | T/T | 7.22 <sup>a</sup>  | 0.46 | T/T | 6.47                | 0.62 |
| Six-month-old | body weight        | A/A | 32.99 <sup>a</sup> | 2.37 | C/C | 28.46 <sup>ab</sup> | 1.30 | C/C | 32.99 <sup>a</sup> | 2.37 | C/C | 28.46 <sup>b</sup> | 1.30 | A/A | 29.47 <sup>a</sup>  | 1.09 |
|               |                    | T/A | 25.69 <sup>c</sup> | 0.97 | C/T | 25.92 <sup>b</sup>  | 0.98 | C/T | 25.95 <sup>b</sup> | 0.98 | C/T | 25.92 <sup>b</sup> | 0.98 | A/T | 25.74 <sup>ab</sup> | 1.08 |
|               |                    | T/T | 29.01 <sup>b</sup> | 1.33 | T/T | 32.99 <sup>a</sup>  | 2.37 | T/T | 28.42 <sup>b</sup> | 1.30 | T/T | 32.99 <sup>a</sup> | 2.37 | T/T | 25.23 <sup>a</sup>  | 3.16 |
|               | body height        | A/A | 58.21 <sup>a</sup> | 3.76 | C/C | 47.33 <sup>b</sup>  | 2.06 | C/C | 58.21 <sup>a</sup> | 3.76 | C/C | 47.33 <sup>b</sup> | 2.06 | A/A | 50.16 <sup>a</sup>  | 1.74 |
|               |                    | T/A | 43.65 <sup>b</sup> | 1.54 | C/T | 43.98 <sup>b</sup>  | 1.56 | C/T | 44.02 <sup>b</sup> | 1.56 | C/T | 43.98 <sup>b</sup> | 1.56 | A/T | 43.49 <sup>ab</sup> | 1.71 |
|               |                    | T/T | 48.12 <sup>b</sup> | 2.11 | T/T | 58.21 <sup>a</sup>  | 3.76 | T/T | 47.27 <sup>b</sup> | 2.07 | T/T | 58.21 <sup>a</sup> | 3.76 | T/T | 41.33 <sup>b</sup>  | 5.02 |
|               | body length        | A/A | 60.81 <sup>a</sup> | 3.98 | C/C | 50.71 <sup>b</sup>  | 2.18 | C/C | 60.81 <sup>a</sup> | 3.98 | C/C | 50.71 <sup>b</sup> | 2.18 | A/A | 52.73 <sup>a</sup>  | 1.84 |
|               |                    | T/A | 46.03 <sup>b</sup> | 1.63 | C/T | 46.39 <sup>b</sup>  | 1.65 | C/T | 46.44 <sup>b</sup> | 1.65 | C/T | 46.39 <sup>b</sup> | 1.65 | A/T | 46.39 <sup>ab</sup> | 1.81 |
|               |                    | T/T | 51.58 <sup>c</sup> | 2.23 | T/T | 60.81 <sup>a</sup>  | 3.98 | T/T | 50.64 <sup>b</sup> | 2.19 | T/T | 60.81 <sup>a</sup> | 3.98 | T/T | 44.30 <sup>a</sup>  | 5.32 |
|               | Shin circumference | A/A | 7.26 <sup>a</sup>  | 0.49 | C/C | 6.24 <sup>b</sup>   | 0.27 | C/C | 7.26 <sup>a</sup>  | 0.49 | C/C | 6.24 <sup>ab</sup> | 0.27 | A/A | 6.35                | 0.22 |
|               |                    | T/A | 5.52 <sup>b</sup>  | 0.20 | C/T | 5.56 <sup>b</sup>   | 0.20 | C/T | 5.57 <sup>c</sup>  | 0.20 | C/T | 5.56 <sup>b</sup>  | 0.20 | A/T | 5.62                | 0.22 |
|               |                    | T/T | 6.36 <sup>a</sup>  | 0.27 | T/T | 7.26 <sup>a</sup>   | 0.49 | T/T | 6.24 <sup>b</sup>  | 0.27 | T/T | 7.26 <sup>a</sup>  | 0.49 | T/T | 5.53                | 0.65 |

Note: The shoulder labels a and b in the same column indicated that the difference was significant ( $P < 0.05$ ), and no shoulder labels or the same shoulder label indicated no significant difference ( $P > 0.05$ ).
